# Supplementary material
Source: PubMed Central journal article supplement (PMC3957912)
Supplement: JVI.03006-13_zjv999098775so5.pdf [file JVI.03006-13_zjv999098775so5.pdf]

## **SUPPLEMENTAL MATERIAL**

**Supplemental Video S1.** Co-expression of NSvc2-N-YFP and the Golgi stack (Man49-mCherry) marker in *Nicotiana benthamiana* epidermal cells. The NSvc2-N-YFP and the Golgi bodies co-localize and move together along the ER track. The NSvc2-N-YFP signals fluoresce green; the Golgi bodies fluoresce red.

**Supplemental Video S2.** Co-expression of NSvc2-YFP and the Golgi stack (Man49-mCherry) marker in *Nicotiana benthamiana* epidermal cells. The NSvc2-C-YFP (processed from the glycoprotein precursor NSvc2-YFP) and the Golgi bodies co-localize and move together along the ER track. The NSvc2-YFP signals fluoresce green; the Golgi bodies fluoresce red.

**Supplemental Video S3.** The effects of LatB treatment on the movement of bodies labeled by NSvc2-N-YFP and Golgi bodies labeled by Man49-mCherry. The NSvc2-N-YFP signals fluoresce green; the Golgi bodies fluoresce red.

**Supplemental Video S4.** The effects of LatB treatment on the movement of bodies labeled by NSvc2-N/NSvc2-C-YFP and Golgi bodies labeled by Man49-mCherry. The NSvc2-YFP signals fluoresce green; the Golgi bodies fluoresce red.

**Supplemental Table S1. List of primers used for making RSV NSvc2 constructs in this study.**

| Clone Name                                                          |   | Primer Name | Primer Sequence                              | Purpose                                                                                                                                                                                                      |
|---------------------------------------------------------------------|---|-------------|----------------------------------------------|--------------------------------------------------------------------------------------------------------------------------------------------------------------------------------------------------------------|
| p1300S-NSvc2-N-YFP                                                  | F | XT746       | CGAGATCTGGTACCATGCATTTTAAATCATATT<br>TC      | To amplify RSV NSvc2-N and clone into p1300S-YFP.                                                                                                                                                            |
|                                                                     | R | XT747       | ACGGATCCGGCGCGCCATTCTCTACTTTTCTA<br>CCC      |                                                                                                                                                                                                              |
| p1300S-NSvc2-C-YFP                                                  | F | XT800       | CGGGTACCATGAGGAAGGGTAGAAAAGTAG               | To amplify RSV NSvc2-C and clone into p1300S-YFP.                                                                                                                                                            |
|                                                                     | R | XT388       | GGGGATCCATCAACCTGTCTGATGTCA                  |                                                                                                                                                                                                              |
| p1300S-NSvc2-Intron-YFP                                             | F | XT746       | CGAGATCTGGTACCATGCATTTTAAATCATATT<br>TC      | To amplify the ST-LS1 intron, N-terminal fragment and C-terminal fragment of NSvc2, respectively, then mix the three fragments and do overlap PCR to obtain NSvc2-Intron and clone into p1300S-YFP.          |
|                                                                     | R | XT959       | GGTAGAAGCAGAACTTACCTCTCTATATTAG<br>AAATGC    |                                                                                                                                                                                                              |
|                                                                     | F | XT957       | GTAAGTTTCTGCTTCTACC                          |                                                                                                                                                                                                              |
|                                                                     | R | XT958       | CTGCACATCAACAAATTTTG                         |                                                                                                                                                                                                              |
|                                                                     | F | XT960       | CAAAATTTGTTGATGTGCAGGTGCACAAATAA<br>TAGTTGTG |                                                                                                                                                                                                              |
|                                                                     | R | XT388       | GGGGATCCATCAACCTGTCTGATGTCA                  |                                                                                                                                                                                                              |
| p1300S-NSvc2-N-46del-YFP                                            | F | XT746       | CGAGATCTGGTACCATGCATTTTAAATCATATT<br>TC      | To amplify RSV NSvc2-N containing a 46 amino acid deletion at the C-terminus and clone into p1300S-YFP.                                                                                                      |
|                                                                     | R | XT807       | GCGGATCCATCTACAACAGGTCTCCTA                  |                                                                                                                                                                                                              |
| p1300S-NSvc2-N-63del-YFP                                            | F | XT746       | CGAGATCTGGTACCATGCATTTTAAATCATATT<br>TC      | To amplify RSV NSvc2-N containing a 63 amino acid deletion at the C-terminus and clone into p1300S-YFP.                                                                                                      |
|                                                                     | R | XT835       | GCGGATCCTAGAAGCCAAAATGCAGGTT                 |                                                                                                                                                                                                              |
| p1300S-SS <sub>N</sub> -TMD <sub>N</sub> CT <sub>N</sub> -YFP       | F | XT746       | CGAGATCTGGTACCATGCATTTTAAATCATATT<br>TC      | To amplify RSV NSvc2-N containing signal peptide (SS <sub>N</sub> ) and transmembrane domain (TMD <sub>N</sub> ) containing the full-length cytoplasmic domain (CT <sub>N</sub> ) and clone into p1300S-YFP. |
|                                                                     | R | XT837       | GAATATCTATAGATGTGGGAGAAAGGGATTGGT<br>GCACC   |                                                                                                                                                                                                              |
|                                                                     | F | XT836       | GGTGCACCAATCCCTTTCTCCCACATCTATAGAT<br>ATTC   |                                                                                                                                                                                                              |
|                                                                     | R | XT747       | ACGGATCCGGCGCGCCATTCTCTACTTTTCTA<br>CCC      |                                                                                                                                                                                                              |
| p1300S-SS <sub>N</sub> -TMD <sub>N</sub> -CT <sub>N</sub> del46-YFP | F | XT746       | CGAGATCTGGTACCATGCATTTTAAATCATATT<br>TC      | To amplify RSV NSvc2-N containing signal sequence (SS <sub>N</sub> ), TMD <sub>N</sub> and the CT <sub>N</sub> with a 46 amino acid deletion                                                                 |
|                                                                     | R | XT837       | GAATATCTATAGATGTGGGAGAAAGGGATTGGT<br>GCACC   |                                                                                                                                                                                                              |
|                                                                     | F | XT836       | GGTGCACCAATCCCTTTCTCCCACATCTATAGAT           |                                                                                                                                                                                                              |

|                                                                   |   |       |                                                  |                                                                                                                                                                                                                     |
|-------------------------------------------------------------------|---|-------|--------------------------------------------------|---------------------------------------------------------------------------------------------------------------------------------------------------------------------------------------------------------------------|
|                                                                   | R | XT807 | ATTC<br>GCGGATCCTACAACAGGTCTCCTATGAC             | and clone into p1300S-YFP.                                                                                                                                                                                          |
| p1300S-SS <sub>N</sub> TMD <sub>N</sub> CT <sub>N</sub> del63-YFP | F | XT746 | CGAGATCT <b>GGT</b> ACCATGCATTTTAAATCATATT<br>TC | To amplify RSV NSvc2-N containing signal sequence (SS <sub>N</sub> ), TMD <sub>N</sub> and the CT <sub>N</sub> with a 63 amino acid deletion and clone into p1300S-YFP.                                             |
|                                                                   | R | XT837 | GAATATCTATAGATGTGGGAGAAAGGGATTGGT<br>GCACC       |                                                                                                                                                                                                                     |
|                                                                   | F | XT836 | GGTGCACCAATCCCTTTCTCCACATCTATAGAT<br>ATTC        |                                                                                                                                                                                                                     |
|                                                                   | R | XT835 | GCGGATCCTAGAAAGCCAAAATGCAGGTT                    |                                                                                                                                                                                                                     |
| p1300S-NSvc-C(TMD <sub>N</sub> CT <sub>N</sub> )-YFP              | F | XT800 | CGGGT <b>ACC</b> ATGAGGAAGGGTAGAAAAGTAG          | To amplify a fragment of NSvc2-C(TMD <sub>N</sub> CT <sub>N</sub> ) which swapping the TMD <sub>C</sub> and the CT <sub>C</sub> with the TMD <sub>N</sub> and CT <sub>N</sub> fragment and clone into p1300S-YFP.   |
|                                                                   | R | XT869 | GAATATCTATAGATGTGGGACATCCAATTGGTG<br>GTGCTG      |                                                                                                                                                                                                                     |
|                                                                   | F | XT868 | CAGCACCACCAATTGGATGTCCCACATCTATAG<br>ATATTC      |                                                                                                                                                                                                                     |
|                                                                   | R | XT747 | ACGGATCCGGCGCGCCCATCTCTACTTTTCTA<br>CCC          |                                                                                                                                                                                                                     |
| p1300S-NSvc-C(TMD <sub>N</sub> CT <sub>N</sub> del46)-YFP         | F | XT800 | CGGGT <b>ACC</b> ATGAGGAAGGGTAGAAAAGTAG          | To amplify a fragment of NSvc2-C(TMD <sub>N</sub> CT <sub>N</sub> del46) which swapping the TMD <sub>C</sub> and the CT <sub>C</sub> with the TMD <sub>N</sub> and CT <sub>N</sub> del46 and clone into p1300S-YFP. |
|                                                                   | R | XT869 | GAATATCTATAGATGTGGGACATCCAATTGGTG<br>GTGCTG      |                                                                                                                                                                                                                     |
|                                                                   | F | XT868 | CAGCACCACCAATTGGATGTCCCACATCTATAG<br>ATATTC      |                                                                                                                                                                                                                     |
|                                                                   | R | XT807 | GCGGATCCTACAACAGGTCTCCTATGAC                     |                                                                                                                                                                                                                     |
| p1300S-CFP-Sec24                                                  | F | XT743 | CGGGATCCATGGGTACGGAGAATCAGGG                     | To amplify the full-length Sec24 gene and clone into p1300S-CFP.                                                                                                                                                    |
|                                                                   | R | XT754 | CGGGATCCTTAGTTTTGTTGAACTTGGCG                    |                                                                                                                                                                                                                     |
| p1300S-Arf1-CFP                                                   | F | XT784 | CGGGATCCATGGGGTTGTCATTGGGAAA                     | To amplify the Arf1 gene and clone into p1300S-CFP.                                                                                                                                                                 |
|                                                                   | R | XT785 | CGGGATCCTGCCTTGCTTGCGATGTTG                      |                                                                                                                                                                                                                     |
| p1300S-Arf1 (T31N)                                                | R | XT795 | CTTGTAGAGGATAGTGTCTTACCAGCAGCAT                  | To site-directed mutagenesis of Arf1 (T31N) and clone into p1300S.                                                                                                                                                  |
|                                                                   | F | XT794 | ATGCTGCTGGTAAGAACAATATCCTCTACAAG                 |                                                                                                                                                                                                                     |

*Kpn* I site is in bold; *Bam*H I site is underlined.
